# Supplementary material for: Identification of a novel HIV-1 third-generation circulating recombinant form (CRF126_0755) in Guangdong, China
Source: Springer Nature journal article supplement (doi:10.1007/s00705-024-06030-6), 2024-04-08
Supplement: MOESM2 [file 26955534]

# CRF126\_0755

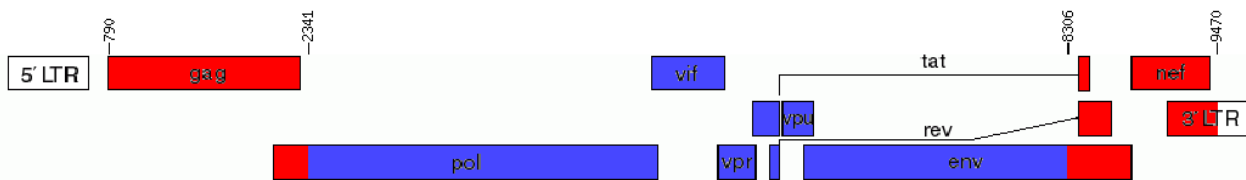

# SZ44LS7251

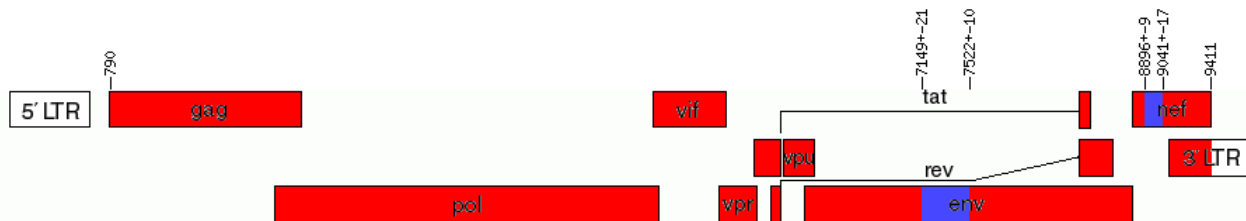

# ZJCIQ15005

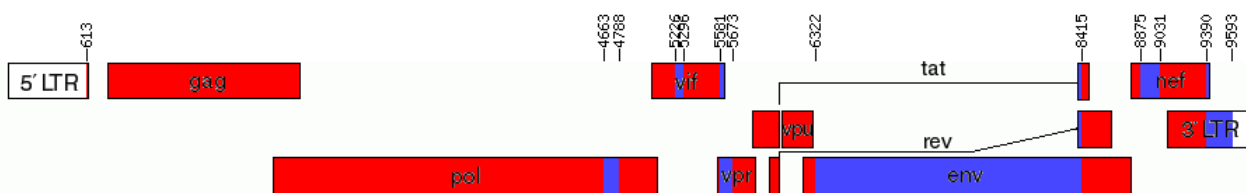

# S15

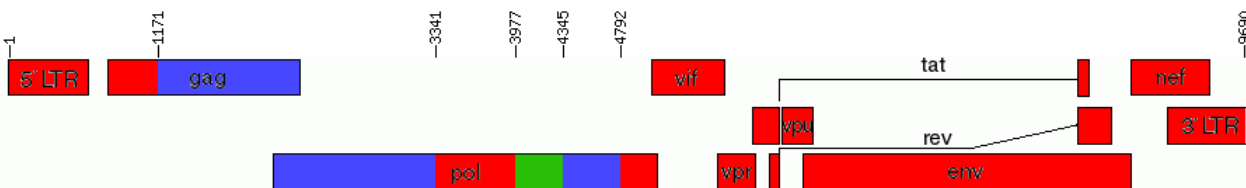

# JM05

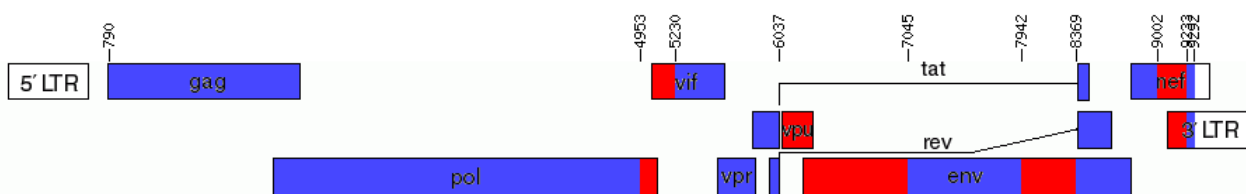

55\_01 07BC 01\_AE
